## The effects of arm movements in tripping in older adults

# 1 Contribution of arm movements to recovery after a trip 2 in older adults.

3

4 Sjoerd M. Bruijn<sup>1,2</sup>, Lizeth H. Sloot<sup>3</sup>, Idsart Kingma<sup>1</sup>, Mirjam Pijnappels<sup>1</sup>

5

6 <sup>1</sup> Department of Human Movement Sciences, Faculty of Behavioural and  
7 Movement Sciences, Vrije Universiteit Amsterdam and Amsterdam Movement  
8 Sciences, Amsterdam, The Netherlands.

9 <sup>2</sup> Department of Orthopaedic Surgery, First Affiliated Hospital, Fujian Medical  
10 University, Fuzhou, Fujian, PR China

11 <sup>3</sup> Optimization, Robotics and Biomechanics Lab, Institut für Technische  
12 Informatik (ZITI), Heidelberg University, Heidelberg, Germany

13

14

15 Corresponding author at:

16 Room A626,

17 Department of Human Movement Sciences,

18 VU University,

19 Van der Boechorststraat 9,

20 1081 BT Amsterdam,

21 The Netherlands.

22 s.m.bruijn@gmail.com

23

24 **Keywords:** trips, arm swing, angular momentum, gait stability

25

## The effects of arm movements in tripping in older adults

26

### Abstract

27 Falls are common in daily life, and our arms play an important role in recovering  
28 balance after a trip. Although older adults fall more often with more serious  
29 consequence, there is limited research into arm movements during falls in older  
30 adults. We investigated how older adults use their arms to recover from a trip  
31 and the difference between fallers and non-fallers.

32 Sixteen older participants walked along a walkway and were occasionally tripped  
33 using a custom tripping device. A biomechanical model used full-body marker  
34 and force-plate data to calculate the body rotation during the trip, and simulated  
35 the rotation without arms (Cut) and with transfer of the arms momentum to the  
36 body (Transfer & Cut). We only analysed the first trip, distinguishing fallers (n=5)  
37 from non-fallers (n=11).

38 Apart from an expected increase in forward body rotation at foot touchdown in  
39 fallers, we found no significant differences between fallers and non-fallers in the  
40 effects of arm movements on trip recovery. Like earlier studies in young  
41 participants, we found that arm movements had most favourable effect in the  
42 transversal plane: by delaying the transfer of angular momentum of the arms to  
43 the body, participants rotated the tripped leg more forward thereby allowing  
44 more room for a larger recovery step. Older adults that are prone to falling might  
45 improve their recovery from a trip by learning to [further] prolong ongoing arm  
46 movement.

47

## The effects of arm movements in tripping in older adults

48

### Introduction

49 Falls are common in daily life, and a large proportion of these falls is caused by  
50 trips or slips (Talbot et al., 2005). The often-seen flailing of the arms after a  
51 perturbation makes one think that humans use their arms for balance recovery  
52 or protective purposes. Previous work has shown that arm swing during normal  
53 walking decreases stability (Bruijn et al., 2010; Meyns et al., 2013; Pijnappels et  
54 al., 2010), whereas extension of ongoing arm swing after a perturbation may be  
55 beneficial for balance recovery (Pijnappels et al., 2010).

56 After tripping, roughly two strategies can be observed; the elevating strategy, in  
57 which the tripped foot is placed over the obstacle, and the lowering strategy, in  
58 which the tripped foot is placed back on the ground before the obstacle (Eng et  
59 al., 1994). Pijnappels et al. (2010) showed that during the elevating strategy,  
60 young adults use their upper extremities to change their body orientation mainly  
61 in the transverse plane. Extension of the ongoing arm movement after obstacle  
62 impact delays the transfer of angular momentum from the arms to the body. This  
63 delay in momentum transfer leads to a more favourable body orientation with  
64 the tripped side being rotated more forward, which allows for a larger recovery  
65 step of the tripped foot.

66 So far, the role of the arms in recovering from a trip has mostly been studied in  
67 young adults, yet it is obvious that older adults suffer more from a poorly  
68 executed trip recovery. It has been suggested that older adults exhibit a more  
69 'protective' recovery strategy, which could hamper their 'preventive' strategy

## The effects of arm movements in tripping in older adults

70 (Roos et al., 2008).It may be that elderly who fall after a trip, do so (partly)

71 because of less adequate arm movements.

72 Thus, we investigated whether and how older adults use their arms to recover

73 from an unexpected trip. Specifically, we evaluated the difference in the effects

74 of arm movements in older adults who fell compared to those who did not.

75

## The effects of arm movements in tripping in older adults

76

### Methods

#### 77 **Participants**

78 16 older adults (11 males,  $69.7 \pm 2.3$  yr,  $79 \pm 14$  kg,  $1.68 \pm 0.09$  m) walked along a  
79 walkway, while in random trials they were tripped using a custom tripping device  
80 (Pijnappels et al., 2010). All participants were fit and had no orthopedic,  
81 neuromuscular, cardiac or visual problems. All participants signed informed  
82 consent, and the protocol was approved by the local ethical committee.

#### 83 **Procedure**

84 First, participants were fitted with clusters of 3 infrared LED's for movement  
85 registration on the feet, calves, thighs, pelvis, thorax, upper and lower arms.  
86 Kinematics were sampled at 50 samples/second (Optotrak, Northern Digital,  
87 Waterloo, Ontario, Canada). Ground reaction forces were sampled at 1000  
88 samples/second. In total, each subject walked on average 64 (SD 10) times along  
89 the walkway, in which they were randomly perturbed 7 (SD 2) times on the right  
90 leg

#### 91 **Calculations**

92 A biomechanical human body model, was used to calculate whole body angular  
93 momentum, angular momenta of the separate segments, as well as a total body  
94 inertial tensor (Pijnappels et al., 2010). We then obtained whole body angular  
95 velocity at each time instant by dividing the angular momenta by the total body  
96 inertial tensor. These angular velocities were subsequently used to estimate the

## The effects of arm movements in tripping in older adults

97 effects of arm movement at trip impact and during recovery phase (Pijnappels  
98 et al., 2010). In short, we calculated total body orientation (starting from 0° at  
99 trip impact) by integrating total body angular velocities over the course of a  
100 recovery until touchdown of the recovery foot (Actual). In addition, we  
101 calculated how the body would have rotated in a hypothetical situation in which  
102 the arms stop moving at the moment of the trip impact, i.e. when arm  
103 momentum is instantaneously transferred to the rest the body (Transfer & Cut,  
104 this calculation estimates the effect of ongoing arm swing at the instant of trip  
105 on body rotation after the trip). Third, we calculated how the body would have  
106 rotated in a hypothetical situation in which the arms do not transfer any  
107 momentum to the body (Cut). This calculation estimates the effects of arm  
108 movements executed during the trip. For mathematical details, see (Pijnappels  
109 et al., 2010).

### 110 **Statistical analysis**

111 We focused on the first trip, in line with previous studies as subsequent trips may  
112 contain habituation effects (Pijnappels et al., 2001). Tripping responses were  
113 manually classified by inspecting the data by two independent observers (LHS &  
114 SMB) into 1) lowering strategy, 2) successful elevating strategy, 3) unsuccessful  
115 elevating strategy. In the current study, we focused on the latter two. We tested  
116 differences between those participants that fell ('fallers', n=5) and those that  
117 did not ('non-fallers', n=11) during this first trial. We compared walking speed  
118 as well as time between impact and touchdown between these groups using an  
119 unpaired t-test. To test for differences in the effects of arm movements on body

## The effects of arm movements in tripping in older adults

120 orientation at touchdown for each plane, we used a mixed model ANOVA, with  
121 Group (faller, non-faller) as between factor, and Calculation mode (Actual,  
122 Transfer & Cut, Cut) as within factor. Significant main effects were followed up  
123 by paired t-tests with Bonferroni correction. All analyses were performed in  
124 Matlab (R2019A, Nattick, Massachusetts: The MathWorks Inc.), and the level of  
125 significance was set at 0.05.

126

127 **Table 1:** Results of the statistical tests. Significant effects are displayed in **bold**.

|             | Calculation mode |        | Fallstatus |       | Calculation mode X Fallstatus |       |
|-------------|------------------|--------|------------|-------|-------------------------------|-------|
|             | F(2,28)          | p      | F(F1,14)   | p     | F(2,28)                       | p     |
| Sagittal    | 5.04             | 0.014  | 9.82       | 0.007 | 0.85                          | 0.438 |
| Frontal     | 16.74            | <0.001 | 0.05       | 0.831 | 1.18                          | 0.324 |
| Transversal | 67.34            | <0.001 | 0.46       | 0.508 | 0.70                          | 0.507 |

128

129

### Results

130 The walking speed of the five fallers (1.48 m/s (SD 0.21)) was not significantly  
131 different from the non-fallers (1.43 m/s (SD 0.07),  $p=0.48$ ). Also, the time  
132 between impact and recovery foot touchdown of fallers (464 ms (SD 84)) did not  
133 significantly differ from non-fallers (496 ms (SD 61),  $p=0.40$ ). Thus, there were  
134 no differences in the time over which angular velocities were integrated between  
135 fallers and non-fallers.

136

## The effects of arm movements in tripping in older adults

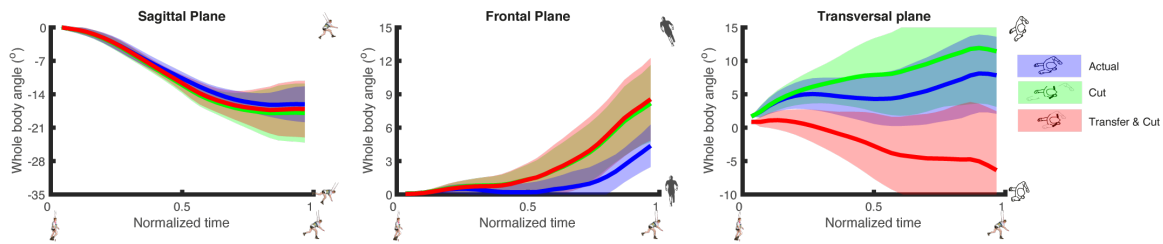

137

138 **Figure 1:** The effects of Calculation mode (different colours) on the total body  
139 orientation (y-axis) as a function of normalised time (x-axis, 0 = trip onset,  
140 1.0=recover touchdow) in the Sagittal (left), Frontal (middle), and  
141 (right) planes. Data represent the mean for the non-fallers. For each panel, the  
142 figures on the right illustrate what each orientation indicates. Shaded regions  
143 represent standard deviations.  
144

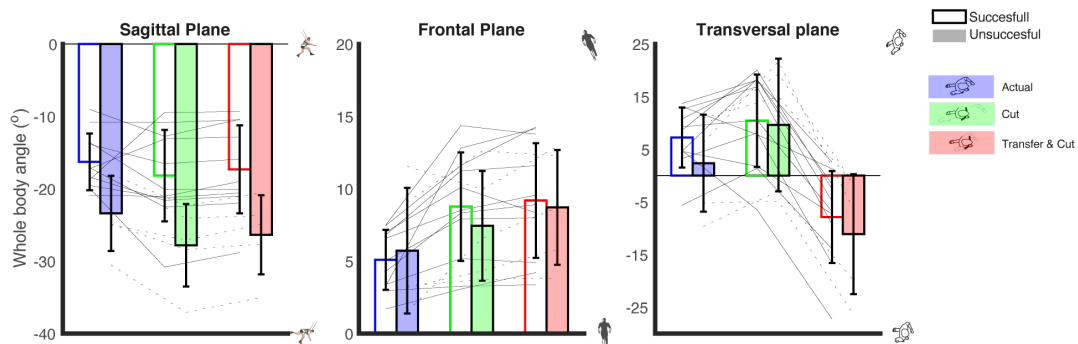

145

146 **Figure2.** Body orientation at touchdown for non-fallers (non-filled bars) and  
147 fallers (solid colours) as a function of Calculation mode (colours). Error bars  
148 represent standard deviations, and lines represent individual data.  
149

150 The time courses of the body rotation for the different Calculation modes for  
151 non-fallers are displayed in figure 1. In the sagittal plane, fallers had a more  
152 forward rotated body configuration at touchdown than non-fallers (see figure 2,  
153 table1). Moreover, the Cut calculation led to small, although significant more  
154 forward body orientation than the Transfer & Cut calculation in both fallers and  
155 non-fallers. There was no significant interaction effect. These findings suggest  
156 that in the sagittal plane, it may be undesirable to delay transfer of angular  
157 momentum from the arms to the body, as this would lead to a less favourable



## The effects of arm movements in tripping in older adults

158 body orientation (as seen in the Cut calculation). However, it should be noted  
159 that this difference between Calculation modes was very small ( $\sim 1^\circ$ ).  
160 In the frontal plane, there was no effect of Fall status, nor was there an  
161 interaction effect. However, the Actual calculation had a smaller rotation to the  
162 tripped side than both the Cut and Transfer & Cut calculations. This indicates  
163 that participants were able to fully cancel all angular momentum that was  
164 present at trip onset (i.e. the Transfer & Cut calculation), and even could  
165 transfer angular momentum from the body to the arms (since the actual  
166 orientation of the body was rotated even less than the Cut calculation.  
167 In the transversal plane, there was also no effect of Fall status, nor was there an  
168 interaction effect. However, the Actual calculation showed an orientation with  
169 the tripped side less rotated forward than the Cut calculation, yet more rotated  
170 than the Transfer & Cut calculation. This indicates that in the transversal plane,  
171 participants significantly benefitted from delaying transfer of angular  
172 momentum from the arms to their body, so much even, that would they not do  
173 so, their body orientation at right recovery touchdown would be rotated  
174 backward at the right side. Still, participants did not manage to delay transfer  
175 of all arm angular momentum, as indicated by a significantly difference between  
176 Actual and Cut calculations

177

## Discussion

178 We studied the effects of arm movements on recovery after a trip in older fallers  
179 and non-fallers. Apart from an expected larger forward rotation of the body in  
180 fallers compared to non-fallers at touchdown, we found no significant

## The effects of arm movements in tripping in older adults

181 differences between fallers and non-fallers. Similar to earlier studies in young  
182 adults, we found that arm movements had most effect in the transversal plane,  
183 where older adults delayed the transfer of angular momentum of the arms to the  
184 body (i.e. behaved like the Cut calculation), thereby gaining a more favourable  
185 body orientation, with the tripped right leg rotated more forward.

186 Interestingly, these arm movements in the transverse plane, which may lengthen  
187 the recovery step, were not significantly different between fallers and non-  
188 fallers. Yet, in a post-hoc analysis, we found that fallers took significantly shorter  
189 recovery steps than non-fallers (0.56m (SD 0.14) for fallers, 0.82m (SD 0.11) for  
190 non-fallers,  $p < 0.01$ ). Thus, falling after a trip indeed seems to be related to  
191 problems with lengthening the step, but this is most likely not related to arm  
192 movements. Nevertheless, we measured only a limited number of participants,  
193 and the number of participants that fell during the first trip was small. Hence,  
194 it may be that there are meaningful differences that we could not detect due to  
195 low statistical power. Although another study suggested that older adults use a  
196 protective arm strategy of both arms limiting impact in case of a fall, which  
197 contributes to destabilizing (Roos et al., 2008), we did not observe such strategies  
198 in our fallers or non-fallers. Furthermore, earlier work strongly suggests that  
199 problems in rate of change in hip, knee and ankle moment that can be generated  
200 during push-off may be a more crucial in successful recovery from a trip than the  
201 contribution of arm movement (Pijnappels et al., 2005).

202 Another approach of understanding the potential importance of arm movements  
203 to falls in older adults is to compare the body rotation of them to earlier reported

## The effects of arm movements in tripping in older adults

204 findings for young adults. In the sagittal plane, calculated body rotation at  
205 recovery foot touchdown in our older on-fallers was more upright than for young  
206 adults ( $-20^\circ$  forward rotation in (Pijnappels et al., 2010), compared to  $\sim 16^\circ$  in our  
207 study). While this could indicate that older adults were better at recovering from  
208 a trip, it could also be related to the fact that they generally walked slower,  
209 thus carrying less momentum (1.54 m/s in (Pijnappels et al., 2010), 1.48 m/s in  
210 ours).

211 The frontal plane body rotations at touchdown in older non-fallers were similar  
212 to the young adults in Pijnappels et al. (2010). However, in the older non-fallers,  
213 both the Transfer & Cut and Cut calculations led to significantly more rotation  
214 towards the tripped side. Thus, our results suggest that in the frontal plane,  
215 older non-fallers not only were able to cancel the angular momentum of the arms  
216 at the instant of a trip fully, but most likely were able to transfer some of the  
217 (hindering) angular momentum in this plane from the body to the arms. How they  
218 were able to do so is an interesting topic for further investigation.

219 In the transverse plane, older non-fallers rotated their tripped side forward by  
220 only  $6.5^\circ$  versus an average of  $18^\circ$  reported for young adults (Pijnappels et al.  
221 (2010), which indicates a substantially less favourable body orientation. Like in  
222 young adults, arm motions in older adults contributed to this rotation compared  
223 to no arm movements. However, there was also a slight but significant difference  
224 between the Actual and Cut calculations, implying that older adults did not  
225 cancel all momentum of the arms at the instant of a trip. Thus, older adults  
226 could perhaps improve their recovery to a trip by further prolonging the ongoing

## The effects of arm movements in tripping in older adults

227 movements of the arms, thereby delaying the transfer of the angular momentum  
228 from the arms to the legs, achieving more forward rotation of the tripped side  
229 and potentially increasing recovery step length.

### 230 **Conclusion**

231 Arm movements during tripping in older adults help to move the body in a more  
232 favourable orientation for balance recovery after a trip, in particular in the  
233 transverse plane. While the recovery step was smaller in fallers, we found only  
234 minor differences in body rotation between fallers and non-fallers. This suggests  
235 that arm movements are not the main factor differentiating fallers from non-  
236 fallers.

### 237 **Acknowledgements**

238 SMB was funded by a VIDI grant (016.Vidi.178.014) from the Dutch Organization  
239 for Scientific Research (NWO) SMB and MP were funded by a by a VIDI grant (VIDI  
240 grant (no. 91714344)) from the Dutch Organization for Scientific Research (NWO)

### 241 **Literature**

242 Bruijn, S.M., Meijer, O.G., Beek, P.J., van Dieen, J.H., 2010. The effects of arm  
243 swing on human gait stability. *Journal of Experimental Biology* 213, 3945-3952.  
244 Eng, J.J., Winter, D.A., Patla, A.E., 1994. Strategies for recovery from a trip in  
245 early and late swing during human walking. *Experimental brain research*.  
246 *Experimentelle Hirnforschung. Experimentation cerebrale* 102, 339-349.  
247 Meyns, P., Bruijn, S.M., Duysens, J., 2013. The how and why of arm swing during  
248 human walking. *Gait & posture* 38, 555-562.  
249 Pijnappels, M., Bobbert, M.F., van Dieen, J.H., 2001. Changes in walking pattern  
250 caused by the possibility of a tripping reaction. *Gait & posture* 14, 11-18.  
251 Pijnappels, M., Bobbert, M.F., van Dieen, J.H., 2005. Push-off reactions in  
252 recovery after tripping discriminate young subjects, older non-fallers and older  
253 fallers. *Gait & posture* 21, 388-394.

## The effects of arm movements in tripping in older adults

- 254 Pijnappels, M., Kingma, I., Wezenberg, D., Reurink, G., Dieën, J.H., 2010. Armed  
255 against falls: the contribution of arm movements to balance recovery after  
256 tripping. *Experimental Brain Research* 201, 689-699.
- 257 Roos, P.E., McGuigan, M.P., Kerwin, D.G., Trewartha, G., 2008. The role of arm  
258 movement in early trip recovery in younger and older adults. *Gait & posture* 27,  
259 352-356.
- 260 Talbot, L.A., Musiol, R.J., Witham, E.K., Metter, E.J., 2005. Falls in young,  
261 middle-aged and older community dwelling adults: perceived cause,  
262 environmental factors and injury. *BMC Public Health* 5, 86.
- 263

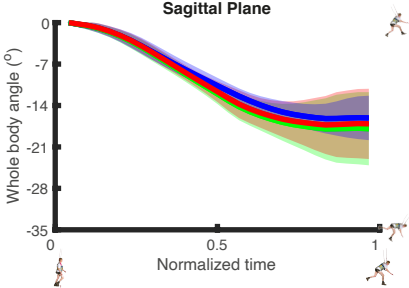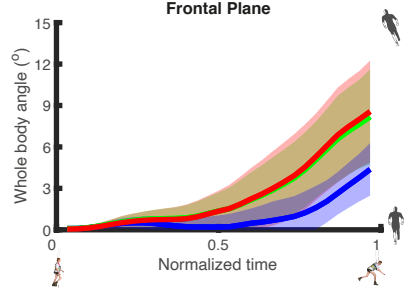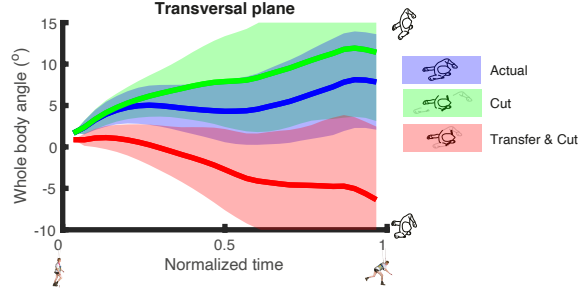

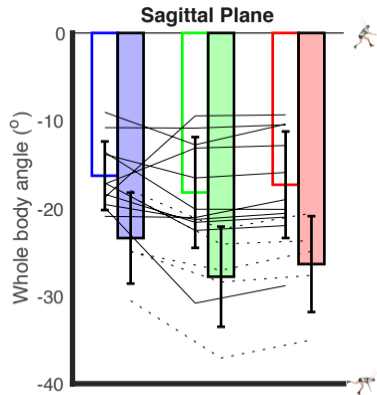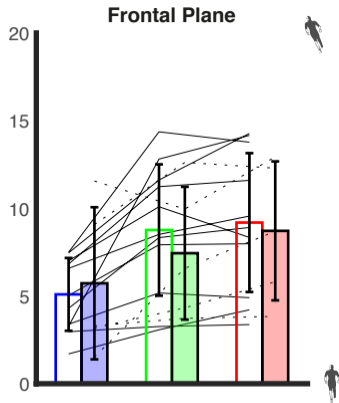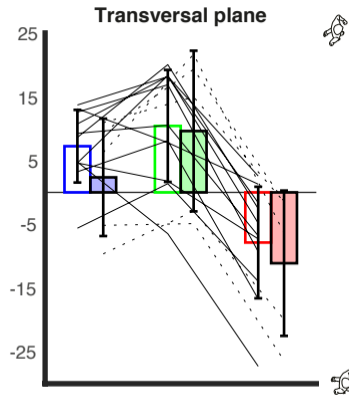

Successful  
 Unsuccessful

Actual  
 Cut  
 Transfer & Cut
